# Supplementary material
Source: PubMed Central journal article supplement (PMC2952404)
Supplement: NIHMS228874-supplement-3.pdf [file NIHMS228874-supplement-3.pdf]

**Supplementary Data Caption**

This Excel workbook contains the 560 metaphorical and literal sentences that were selected after behavioral norming. For each of the four conditions (predicate-motion, predicate-auditory, nominal-motion, nominal-auditory) there are 70 metaphor-literal sentence pairs. The normative data associated with every item is also provided: base term visual imagery, base term auditory imagery, positive valence ratio, valence judgment reaction time, interpretability, familiarity, naturalness, imageability, figurativeness, length in characters, length in words, length in content words, average frequency using two different measures, average concreteness, and the frequency and concreteness values for individual content words of each sentence.

Preprint  
Review Only

1  
2  
3  
4  
5  
6  
7  
8  
9  
10  
11  
12  
13  
14  
15  
16  
17  
18  
19  
20  
21  
22  
23  
24  
25  
26  
27  
28  
29  
30  
31  
32  
33  
34  
35  
36  
37  
38  
39  
40  
41  
42  
43  
44  
45  
46  
47  
48  
49  
50  
51  
52  
53  
54  
55  
56  
57  
58  
59  
60
